# Supplementary material for: Machine learning and biological validation identify sphingolipids as potential mediators of paclitaxel-induced neuropathy in cancer patients
Source: eLife. 2024 Sep 30;13:RP91941. doi: 10.7554/eLife.91941 (PMC11444680; doi:10.7554/eLife.91941)
Supplement: Supplementary file 1. [file elife-91941-supp1.xlsx]

## Sheet: Patient characteristics 
		male / female	Age at diagnosis	diagnosis	Paclitaxel treatment /regime	Neuropathy after Chemo? Grade?	Duration of neuropathy
		female	41	breast cancer	Paclitaxel weekly 12 w 80 mg/m²	Yes, grade 1	2 months
		female	35	breast cancer	Paclitaxel weekly 12 w 80 mg/m²	Yes, grade 1	2 months
		female	34	breast cancer	Paclitaxel weekly 12 w 80 mg/m²	no	no
		female	57	endometrial carcinoma	Carboplatin-Paclitaxel 6x every three weeks	Yes, grade 1	4.5 years (until last check)
		female	56	breast cancer	Paclitaxel weekly 12 w 220 mg/m²	Yes, grade 2	4.5 years (until last check) increasing
		female	60	breast cancer	Paclitaxel weekly 12 w 80 mg/m²	no	no
		female	41	breast cancer	Paclitaxel weekly	Yes, grade 1	3 months
		female	48	breast cancer	Paclitaxel weekly 12 w 80 mg/m²	Yes, grade 2	4.5 years (until last check)
		female	50	breast cancer	Paclitaxel weekly 12 w 80 mg/m²	Yes, grade 1	4.5 years (until last check)
		female	27	breast cancer	Carboplatin-Paclitaxel weekly	no	no
		female	84	breast cancer	Carboplatin-Paclitaxel 12 w	Yes, grade 1	1 year
		female	51	breast cancer	Paclitaxel weekly 12 w 80 mg/m²	no	no
		female	83	breast cancer	Paclitaxel weekly 10 w nab-Paclitaxel 6w	Yes, grade 3	4.5 years (until last check) increasing
		female	30	breast cancer	Carboplatin-Paclitaxel weekly 12 w	Yes, grade 1	2-3 months
		female	46	breast cancer	Paclitaxel weekly 12 w 80 mg/m²	no	no
		female	41	breast cancer	Paclitaxel weekly 12 w 80 mg/m²	no	no
		female	50	breast cancer	Paclitaxel weekly 12 w 80 mg/m²	Yes, grade 3	4.5 years (until last check)
		female	60	breast cancer	Paclitaxel weekly 12 w 80 mg/m²	no	no
		female	39	breast cancer	Paclitaxel weekly 12 w 80 mg/m²	no	no
		female	27	breast cancer	Carboplatin-Paclitaxel 12 w	Yes, grade 1	4 months
		female	46	breast cancer	Paclitaxel weekly 12 w 80 mg/m²	no	no
		female	54	breast cancer	Paclitaxel weekly 12 w 80 mg/m²	Yes, grade 1	4.5 years (until last check)
		female	68	endometrial carcinoma	Carboplatin-Paclitaxel 6x every three weeks	Yes, grade 1	n.a.
		female	49	serous ovarian carcinoma	Carboplatin-Paclitaxel 6x every three weeks	Yes, grade 1	4 months
		female	48	breast cancer	Paclitaxel weekly 12 w 80 mg/m²	no	no
		female	61	breast cancer	Paclitaxel weekly 12 w 80 mg/m²	Yes, grade 2	n.a.
		female	41	breast cancer	Paclitaxel weekly 12 w 80 mg/m²	Yes, grade 1	4.5 years (until last check)
		male	36	breast cancer (male)	Paclitaxel weekly 12 w 80 mg/m²	no	no
		female	70	breast cancer	Paclitaxel weekly 12 w 80 mg/m²	no	no
		female	45	breast cancer	Paclitaxel weekly 12 w 80 mg/m²	no	no
		female	34	breast cancer	Paclitaxel weekly 12 w 80 mg/m²	no	no
		Last check of neuropathy was 4.5 years after initiating chemotherapy. Neuropathy was assessed according to the guidelines of the NCI Common Terminology Criteria for Adverse Events (CTCAE) v5.0. The median age of this patient cohort was 56 years.
		Abbreviations: TNBC: triple negative breast carcinoma, DCIS: ductal carcinoma in situ.
