# Supplementary material for: Machine learning and biological validation identify sphingolipids as potential mediators of paclitaxel-induced neuropathy in cancer patients
Source: eLife. 2024 Sep 30;13:RP91941. doi: 10.7554/eLife.91941 (PMC11444680; doi:10.7554/eLife.91941)
Supplement: Supplementary file 2. [file elife-91941-supp2.xlsx]

## Sheet: Complete list of lipids
	Lipid group	Method	Number of detected lipids	Detected lipids in all samples
	Eicosanoids	LC-MS/MS	14	Epoxyeicosatrienoic acids (EETs, 5,6-, 8,9-, 11,12-, 14,15), Dihydroxyeicosatrienoic acids, (DHETs, 5,6-, 8,9-, 11,12-, 14,15-), Hydroxyeicosatetraenoic acids (HETEs, 5-, 12-, 15-, 20), Thromboxane B2, arachidonic acid
	Oxidized linoleic acid metabolites (O(x)LAMs)	LC-MS/MS	7	Epoxyoctadecaenoic acids (EpOMEs, 9,10-, 12,13-), dihydroxyoctadecaenoic acids (DiHOMEs, 9,10-, 12,13-), Hydroxyoctadecadienoic acids (HODEs, 9-, 13-), linoleic acid
	Endocannabinoids	LC-MS/MS	5	Anandamide (AEA), Palmitoylethanolamide (PEA), Oleoylethanolamide (OEA), 1-Arachidonylglycerol, (1-AG), 2-Arachidonylglycerol (2-AG)
	Lysophosphatidic acids (LPAs)	LC-MS/MS	5	LPA 16:0, LPA 18:0, LPA 18:1, LPA 20:4, LPA 18:2
	Pterins	LC-MS/MS	2	Biopterin, Neopterin
	Sphingolipids / Ceramides	LC-MS/MS	19	Sphingosin-1-phosphate (S1P), Sphinganine-1-phosphate (SA1P), Sphinganines C24, C24:1, Ceramides C16, C18, C22, C22:1, C23, C24, d18:2/24:0, d18:0/22:0, d18:0/24:0, d18:2/22:0, Glycosylceramides 16:0, 24:0, 24:1, Lactosylceramides 16:0, 24:1
		LC-QTOFMS	27	Sphingomyelin 30:1, 2:1, 32:2, 33:1, 33:2, 34:0, 34:1, 34:2, 35:1, 36:0, 36:1, 36:2, 36:3, 37:1, 38:1, 38:2, 39:1, 40:1, 40:2, 40:3, 41:1, 41:2, 42:1, 42:2, 42:3, 43:1, 43:2
	Cholesterol and -esters	LC-QTOFMS	12	Cholesterol, Cholesterylester 14:1, 16:1, 17:1, 18:1, 18:2, 20:3, 20:4, 20:5, 22:4, 22:6, 24:1
	Diacylglycerols	LC-QTOFMS	11	DAG 32:1, 34:1, 34:2, 34:3, 34:4, 36:1, 36:2, 36:3, 36:4, 38:5, 38:6
	Triacylglycerols	LC-QTOFMS	27	TAG 44:0,46:1, 48:1, 48:2, 50:1, 50:2, 50:3, 50:4, 52:1, 52:2, 52:3, 52:4, 54:1, 54:2, 54:3, 54:4, 54:5, 54:6, 56:2, 56:3, 58:2, 58:3, 58:4, 58:6, 56:4, 56:5, 56:6
	Phosphatidylcholines	LC-QTOFMS	36	PC 30:0, 30:1, 30:2, 32:0, 32:1, 32:2, 33:1, 33:2, 34:0, 34:1, 34:2, 34:3, 34:4, 34:5, 36:1, 36:2, 36:3, 36:4, 36:5, 38:2, 38:3, 38:4, 38:6, 40:4, 40:6, 40:7, 16:0e/18:2, 16:0e/20:4, 16:0e/16:0, 16:0p/16:0, 16:0p/18:1, 16:0p/18:2, 16:0p/20:4, 18:0e/20:4, 18:0p/20:4, 34:0p/34:1e
	Phosphatidylethanolamines	LC-QTOFMS	21	PE 32:1, 34:1, 34:2, 34:3, 34:4,36:1, 36:2, 36:3, 36:4, 36:5, 38:4, 38:5, 38:6, 40:6, 40:7, 16:0p/18:2, 16:0p/20:4, 18:0p/18:1, 18:0p/18:2, 18:0p/20:4,18:1p/20:4
	Phosphatidylinositols	LC-QTOFMS	12	PI 32:1, 34:1, 34:2, 34:3, 36:1, 36:2, 36:3, 36:4, 38:3, 38:4, 38:6, 40:6
	Lysophosphatidylcholines	LC-QTOFMS	24	LPC 14:0, 15:0, 16:0, 16:1, 17:0, 18:0, 18:1, 18:2, 18:3, 20:0, 20:1, 20:2, 20:3, 20:4, 20:5, 22:0, 22:4, 22:5, 22:6, 24:0, 16:0e, 16:0p, 18:0e, 18:0p
	Lysophosphatidylethanolamines	LC-QTOFMS	9	LPE 16:0, 16:0e, 18:0, 18:0p, 18:1, 18:2, 20:3, 20:4, 22:6
	Lysophosphatidylinositols	LC-QTOFMS	4	LPI 18:0, 18:2, 20:3, 20:4
	Free fatty acids	LC-QTOFMS	17	Myristinic acid (14:0), pentadecanoic acid (15:0), palmitic acid (16:0), palmitoleic acid (16:1),margarinic acid (17:0) heptadecenoic acid (17:1), oleic acid (18:1), linoleic acid (18:2), alpha linoleic acid(18:3), stearidonic acid (18:4), eicosaeinoic acid (20:1), eicosadienoic acid (20:2), arachidonic acid (20:4) eicosapentaenoic acid (20:5), docosatetraenoic acid (22:4), docosahexaenoic acid (…
	Other lipids	LC-QTOFMS	3	Hydroxydehydroepiandrosteronsulfate, Dehydroepiandrosteronsulfate, Cholesterolsulfate
	In total, 255 individual lipids were detected
