# Supplementary material for: Machine learning and biological validation identify sphingolipids as potential mediators of paclitaxel-induced neuropathy in cancer patients
Source: eLife. 2024 Sep 30;13:RP91941. doi: 10.7554/eLife.91941 (PMC11444680; doi:10.7554/eLife.91941)
Supplement: Supplementary file 3. [file elife-91941-supp3.xlsx]

## Sheet: Patients 2nd cohort 
	male / female	Age at diagnosis	Paclitaxel treatment /regime	Neuropathy after 6th cycle of Chemo? Grade?
	female	67	Paclitaxel weekly 6 w 80 mg/m²	Yes, grade 1
	female	63	Paclitaxel weekly 6 w 80 mg/m²	no
	female	71	Paclitaxel weekly 6 w 80 mg/m²	no
	female	63	Paclitaxel weekly 6 w 80 mg/m²	no
	female	57	Paclitaxel weekly 6 w 80 mg/m²	no
	female	53	Paclitaxel weekly 6 w 80 mg/m²	no
	female	61	Paclitaxel weekly 6 w 80 mg/m²	no
	female	46	Paclitaxel weekly 6 w 80 mg/m²	no
	female	63	Paclitaxel weekly 6 w 80 mg/m²	no
	female	55	Paclitaxel weekly 6 w 80 mg/m²	no
	female	67	Paclitaxel weekly 6 w 80 mg/m²	no
	female	51	Paclitaxel weekly 6 w 80 mg/m²	no
	female	28	Paclitaxel weekly 6 w 80 mg/m²	Yes, grade 1
	female	56	Paclitaxel weekly 6 w 80 mg/m²	no
	female	67	Paclitaxel weekly 6 w 80 mg/m²	Yes, grade 1
	female	35	Paclitaxel weekly 6 w 80 mg/m²	no
	female	61	Paclitaxel weekly 6 w 80 mg/m²	no
	female	51	Paclitaxel weekly 6 w 80 mg/m²	Yes, grade 1
	female	49	Paclitaxel weekly 6 w 80 mg/m²	no
	female	60	Paclitaxel weekly 6 w 80 mg/m²	no
	female	48	Paclitaxel weekly 6 w 80 mg/m²	Yes, grade 1
	female	38	Paclitaxel weekly 6 w 80 mg/m²	no
	female	53	Paclitaxel weekly 6 w 80 mg/m²	no
	female	48	Paclitaxel weekly 6 w 80 mg/m²	no
	female	29	Paclitaxel weekly 6 w 80 mg/m²	Yes, grade 1
	female	34	Paclitaxel weekly 6 w 80 mg/m²	no
	female	54	Paclitaxel weekly 6 w 80 mg/m²	no
	female	45	Paclitaxel weekly 6 w 80 mg/m²	no
	Neuropathy was assessed according to the guidelines of the NCI Common Terminology Criteria for Adverse Events (CTCAE) v5.0. The median age of this patient cohort was 53.
